# Supplementary material for: Effect of precursor components on the photovoltaic performance of MA1−xFAxPbI3−yBry films prepared via a one-step method
Source: Royal Society of Chemistry journal article supplement (doi:10.1039/c6qi00580b), 2017-01-01
Supplement: c6qi00580b1.pdf [file c6qi00580b1.pdf]

## Supporting Information

Effect of the precursor components on the photovoltaic  
performance of  $\text{MA}_{1-x}\text{FA}_x\text{PbI}_{3-y}\text{Br}_y$  film prepared *via* one-step  
deposition

Chuan Lung Chuang<sup>b</sup>, Chia-Yuan, Chen<sup>a,b</sup>, Chien-Hung Chiang<sup>b</sup>, Chun-Guey Wu<sup>\*a,b</sup>

<sup>a</sup>*Department of Chemistry, National Central University, Jhong-Li, 32001 Taiwan,  
ROC*

<sup>b</sup>*Research Center for New Generation Photovoltaics, National Central University,  
Jhong-Li, 32001 Taiwan, ROC*

\*Corresponding author. C. G. Wu

E-mail address: t610002@cc.ncu.edu.tw

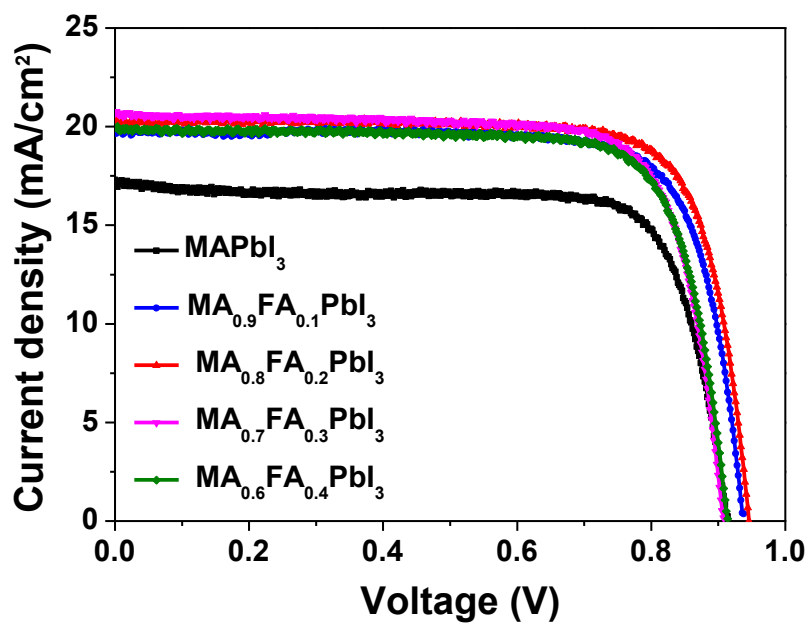

Figure S1: I-V curves of the inverted cells based on  $\text{MA}_{1-x}\text{FA}_x\text{PbI}_3$

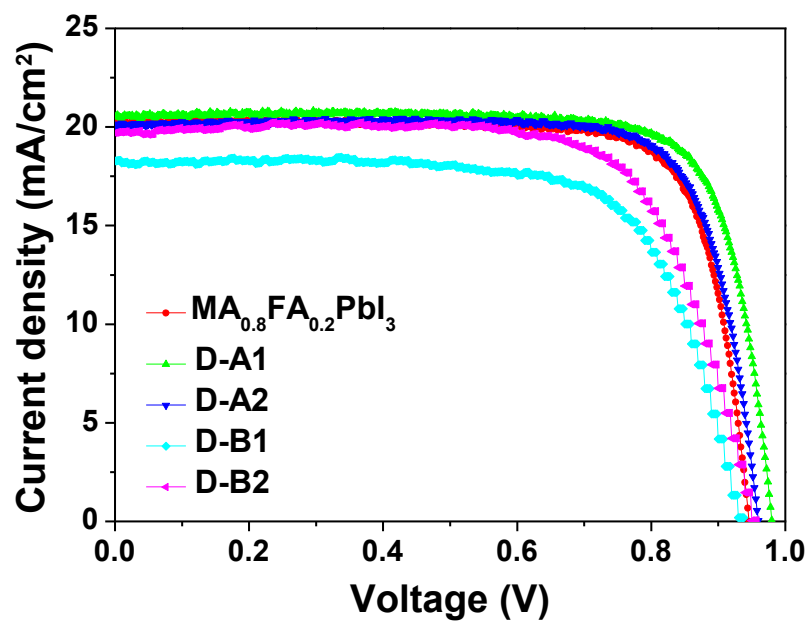

Figure S2: I-V curves of the inverted cells based on  $\text{MA}_{0.8}\text{FA}_{0.2}\text{PbI}_3$  and  $\text{MA}_{0.8}\text{FA}_{0.2}\text{PbI}_{3-y}\text{Br}_y$  prepared from two different precursor solutions

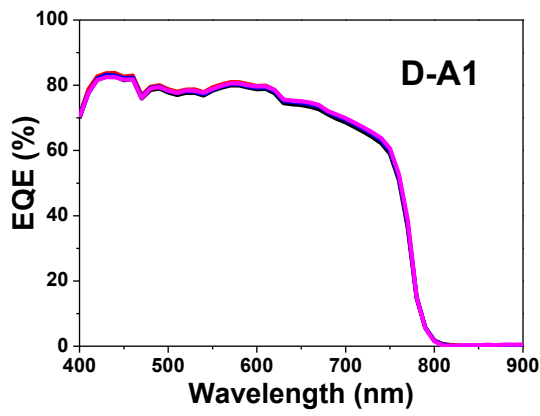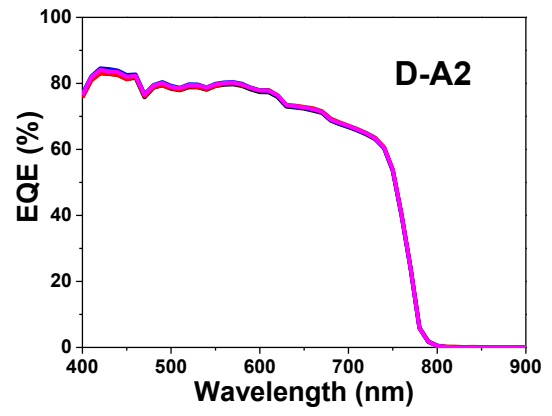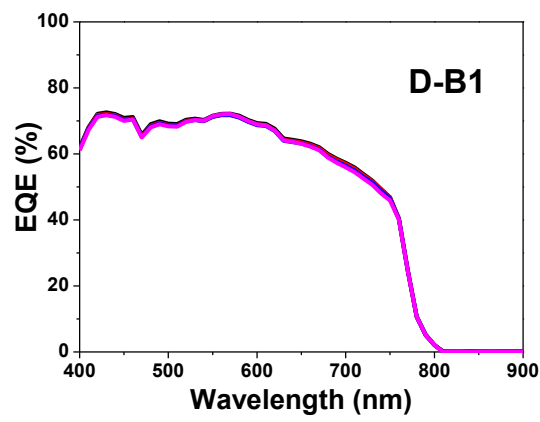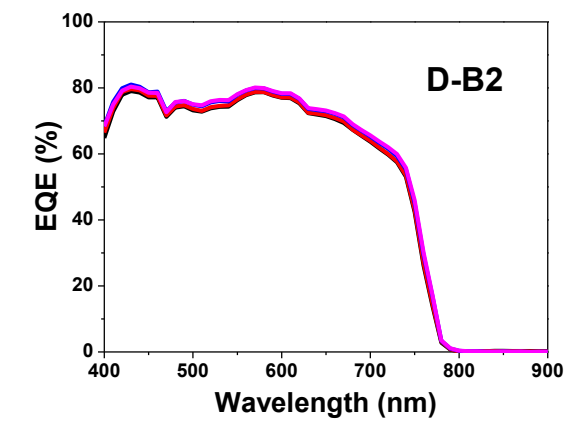

Figure S3: The EQE curves of the cells measured at 4 different positions
